# Supplementary material for: Transtibial Pullout Repair of Lateral Meniscus Posterior Root Tear with Tissue Loss: A Case with Anterior Cruciate Ligament Injury and Medial Meniscus Tear
Source: Hindawi journal article supplement (doi:10.1155/2022/9776388), 2022-08-31
Supplement: f1 [file 9776388.f1.pdf]

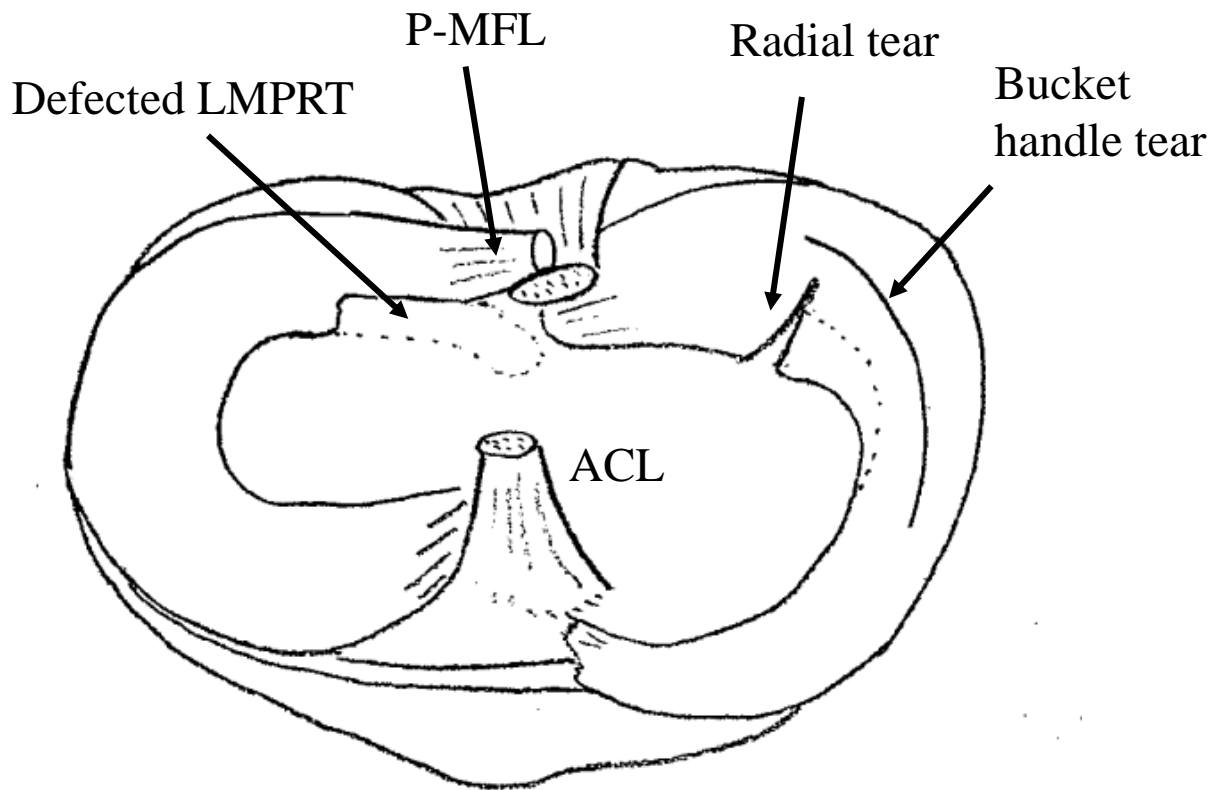

Supplemental Fig. 1. The schematic description of the right tibial plateau from above, showing the LMPRT and complex MM tears.

**Supplemental Fig.1**
